# Supplementary material for: Large area chemical vapor deposition of monolayer transition metal dichalcogenides and their temperature dependent Raman spectroscopy studies
Source: Royal Society of Chemistry journal article supplement (doi:10.1039/c5nr07401k), 2016-01-01
Supplement: c5nr07401k1.pdf [file c5nr07401k1.pdf]

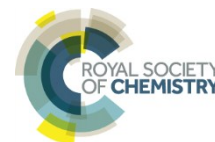

Nanoscale

ARTICLE

**Electronic Supplementary Material**

**Large area chemical vapor deposition of monolayer transition metal dichalcogenides and their Temperature Dependent Raman Spectroscopy studies**

*Amit S. Pawbake,<sup>a,b</sup> Mahendra S. Pawar,<sup>b</sup> Sandesh R. Jadkar,<sup>a</sup> Dattatray J. Late<sup>b\*</sup>*

*<sup>a,\*</sup>Physical and Material Chemistry Division, CSIR – National Chemical Laboratory, Pune, 411008, Maharashtra, India. E-mail: datta099@gmail.com; dj.late@ncl.res.in*

*<sup>b</sup>School of Energy Studies, Department of Physics, Savitribai Phule Pune University, Pune 411007, India.*

Figure S1:

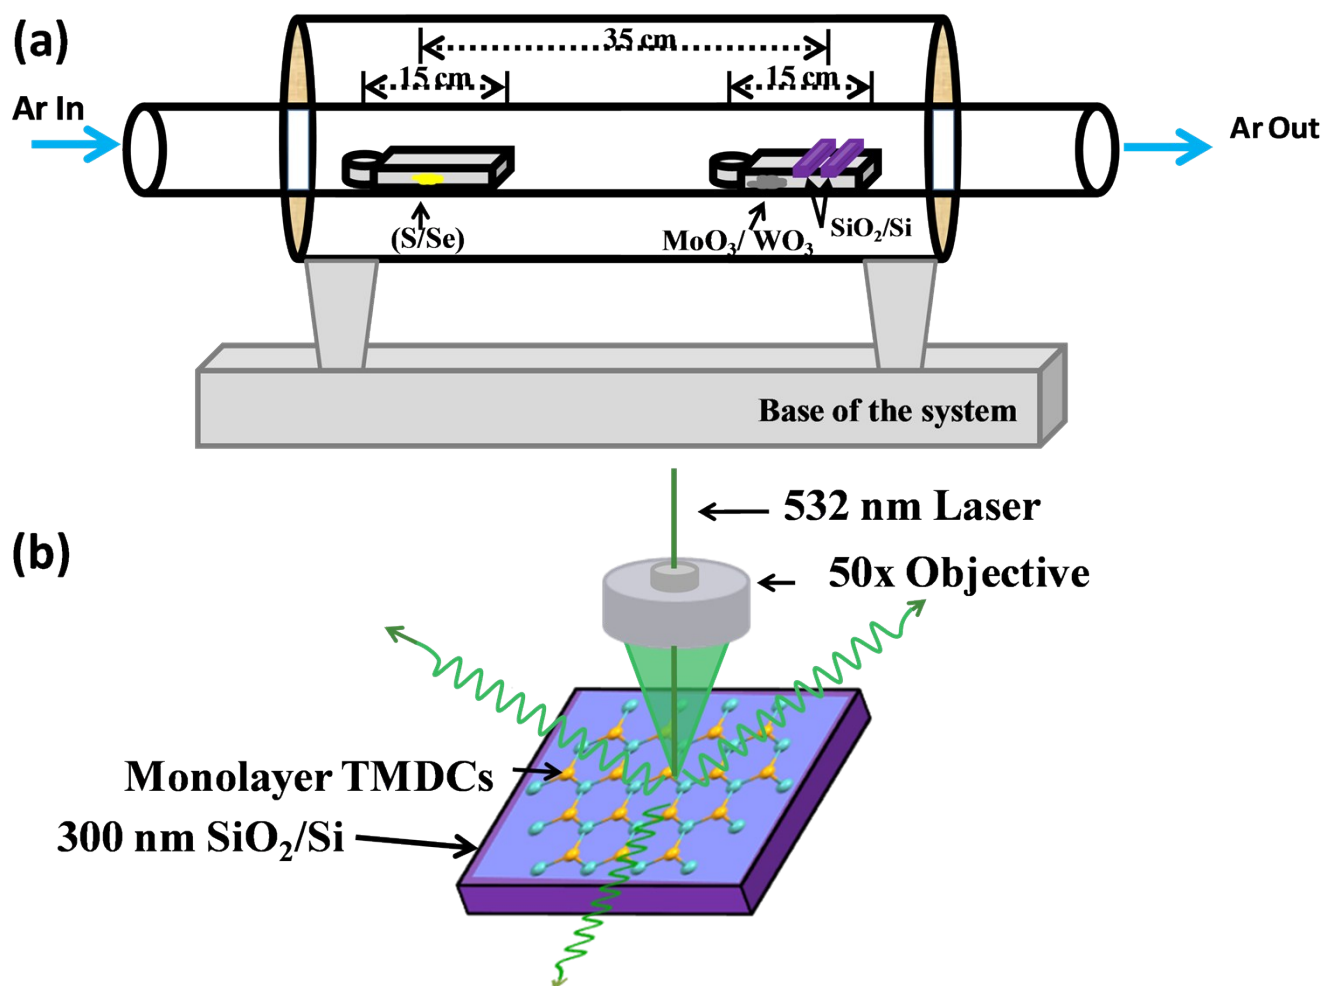

**Figure S1:** Experimental set up of (a) chemical vapor deposition and (b) Temperature dependant Raman Spectroscopy.

**Figure S2:****(a)**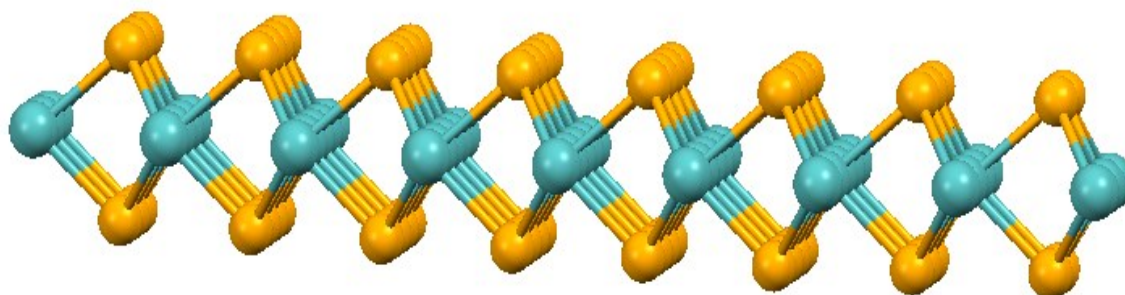**(b)**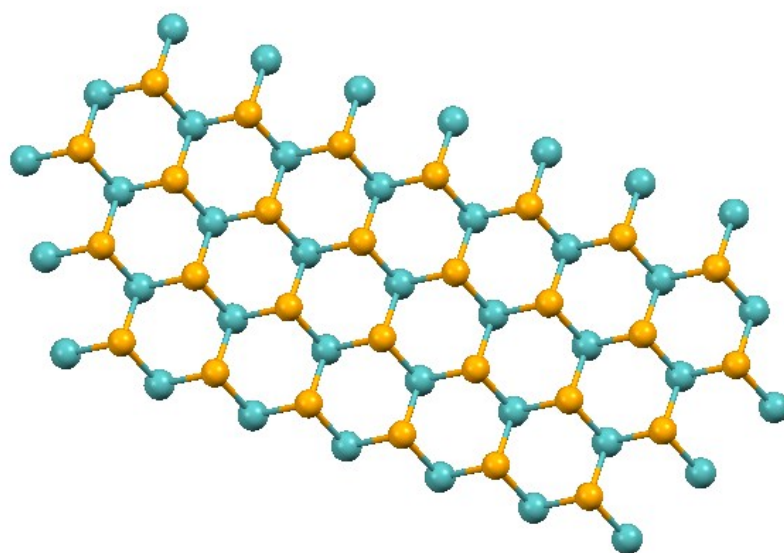

● : S/Se

● : Mo/W

**Figure S2:** Three dimensional Representations of single layer TMDCs (a) side view (b) top view.

**Figure S3:**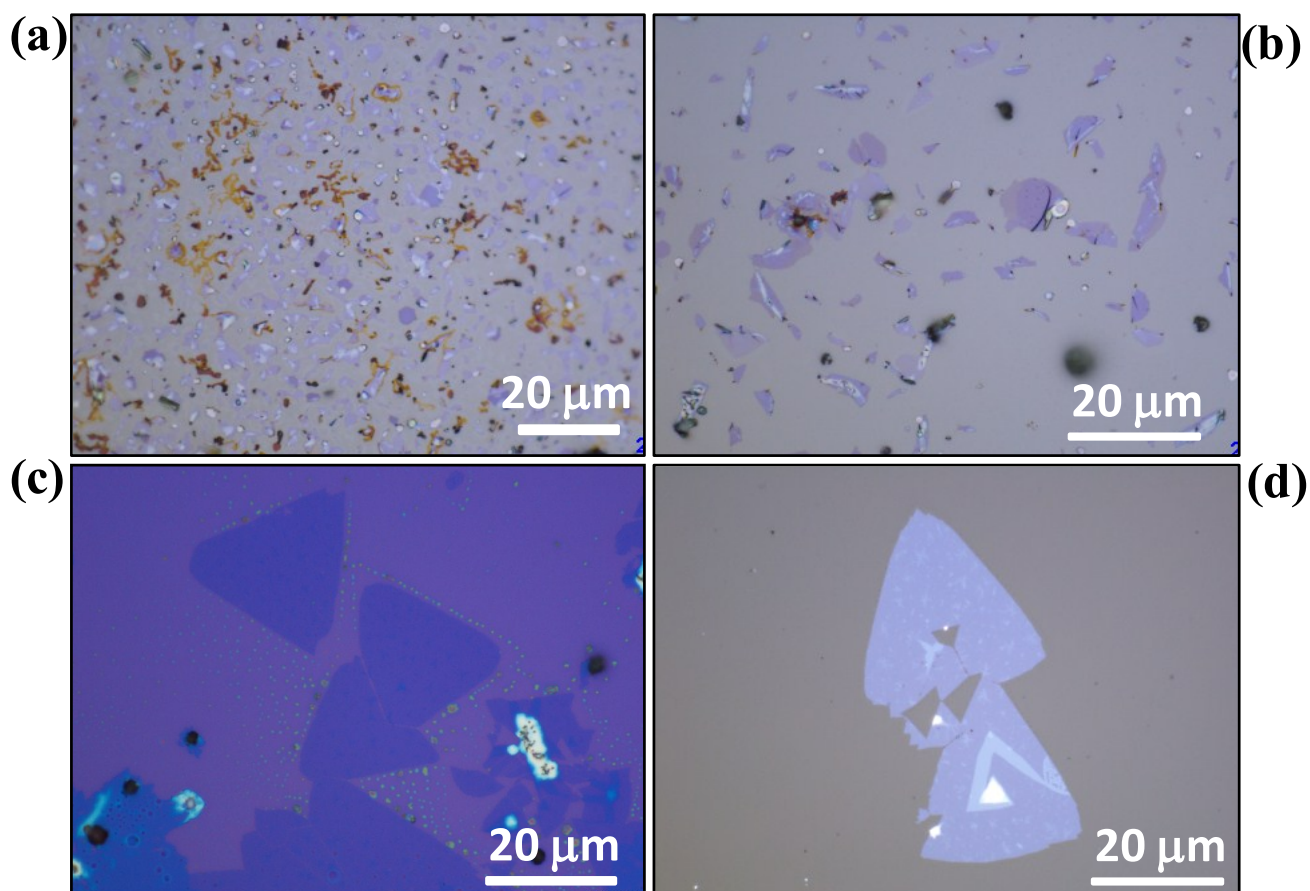

**Figure S3:** Optical image for CVD grown MoS<sub>2</sub> monolayer sample on various substrate (a) *n*-Si (b) *p*-Si (c) SiO<sub>2</sub>/Si and (d) quartz.

Figure S4:

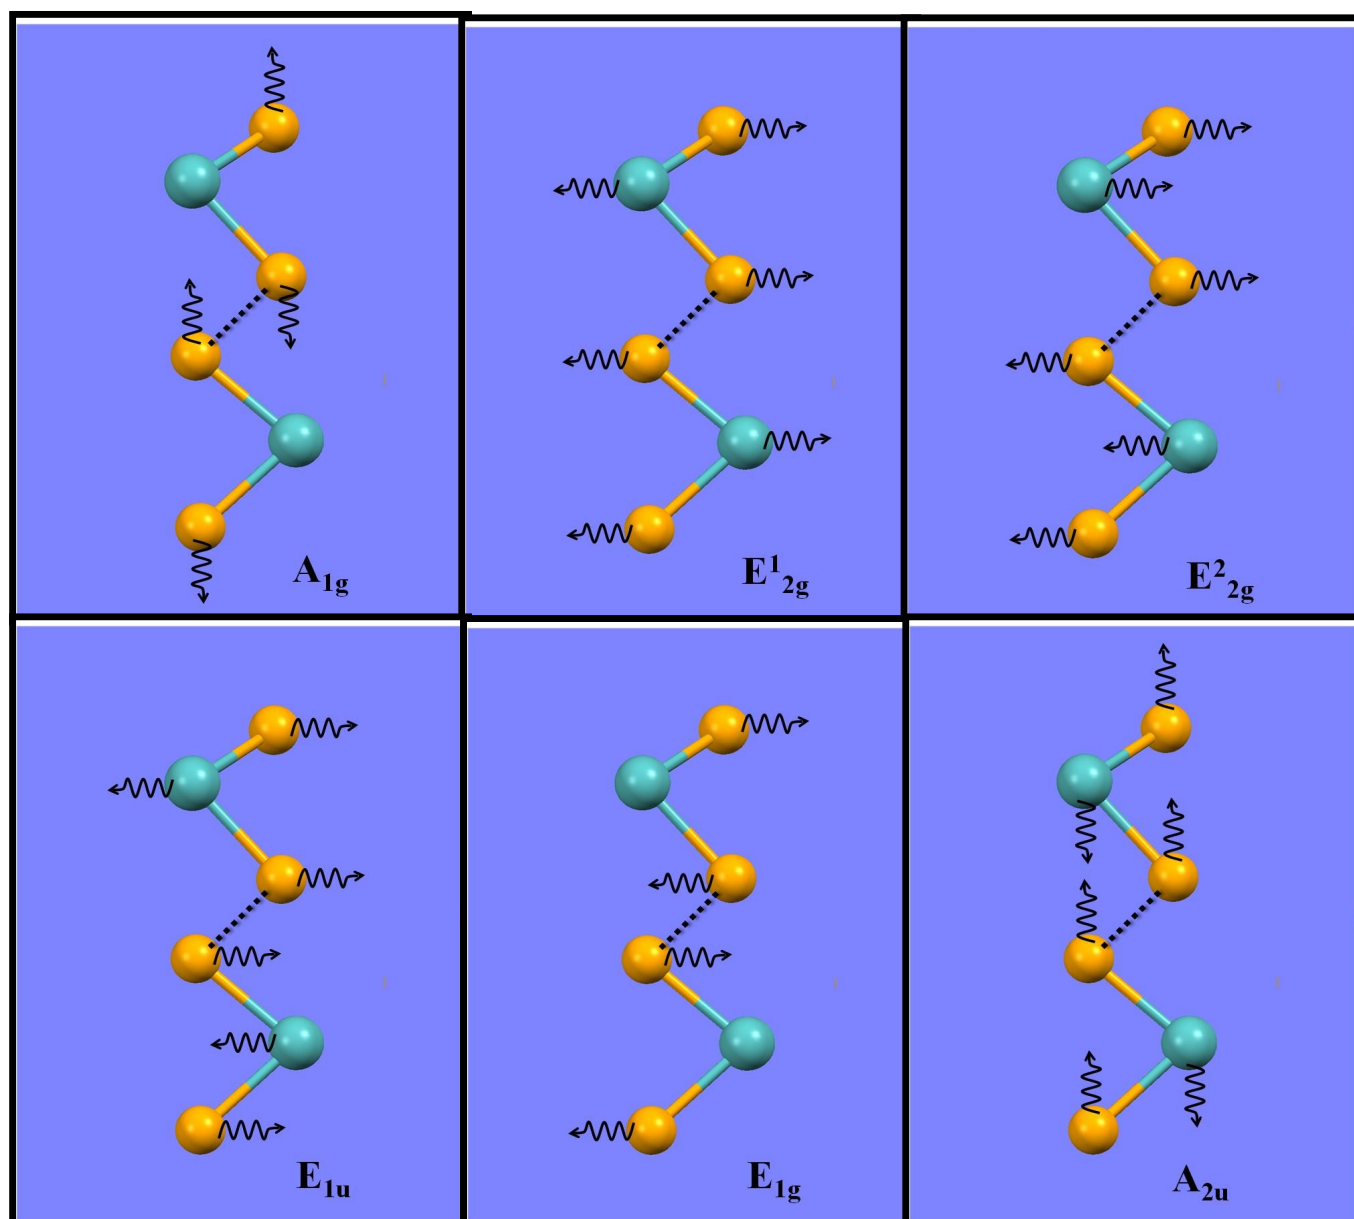

**Figure S4:** Possible vibrational modes ( $A_{1g}$ ,  $E^1_{2g}$ ,  $E^2_{2g}$ ,  $E_{1u}$ ,  $E_{1g}$  and  $A_{2u}$ ) for transition metal dichalcogenides.

**Figure S5:**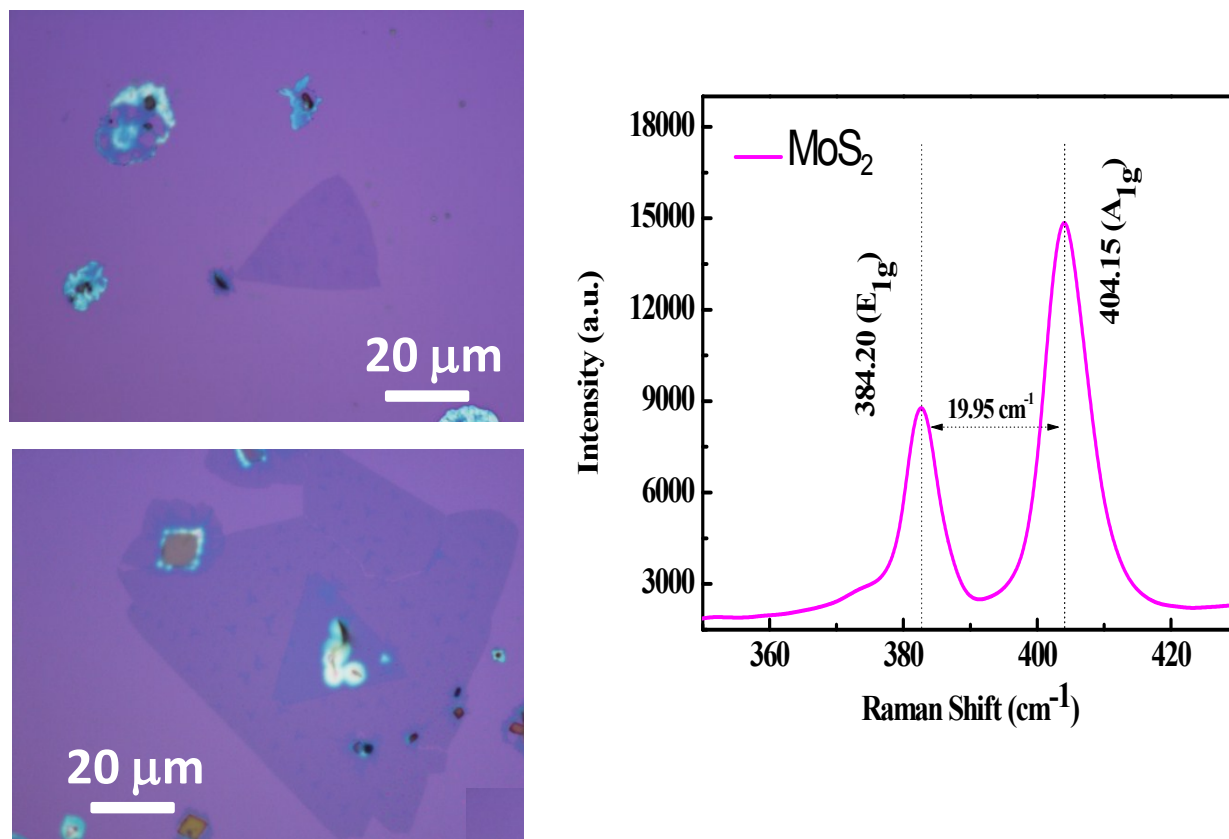**Figure S5:** Typical optical microscope image and Raman spectra of large area CVD grown monolayer MoS<sub>2</sub>.

**Figure S6:**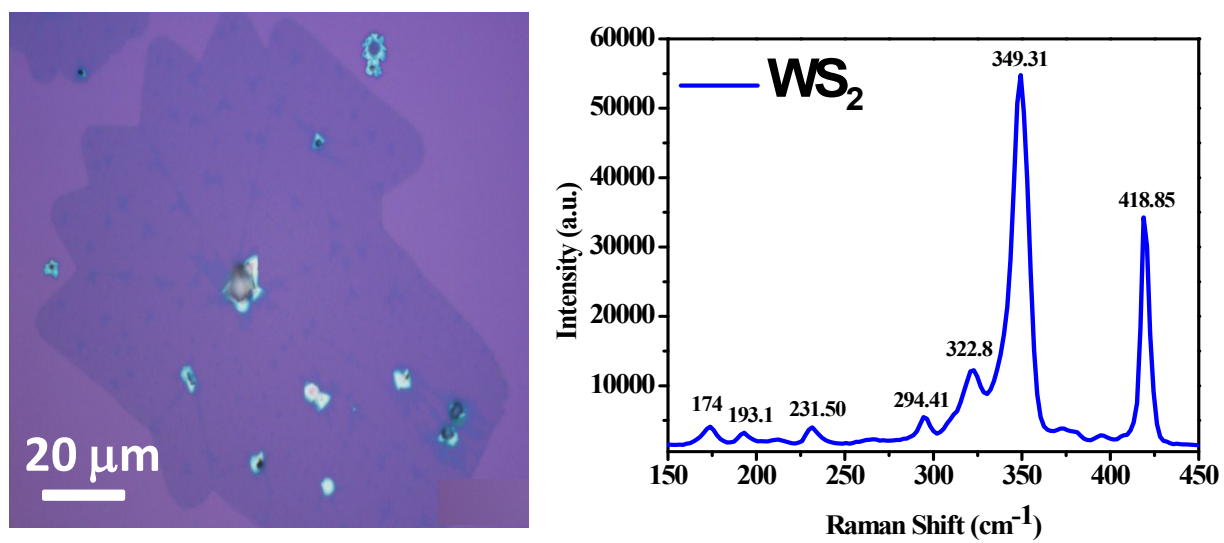

**Figure S6:** Typical optical microscope image and Raman spectra of large area CVD grown monolayer WS<sub>2</sub>.

**Figure S7:**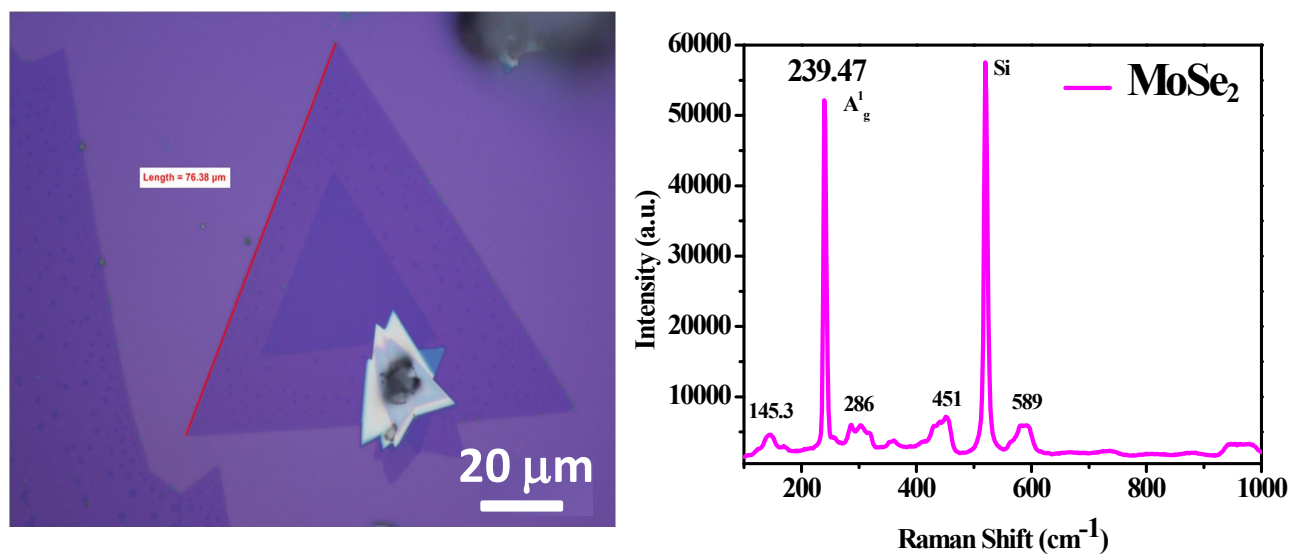**Figure S7:** Typical optical microscope image and Raman spectra of large area CVD grown monolayer MoSe<sub>2</sub>.



**Figure S8:**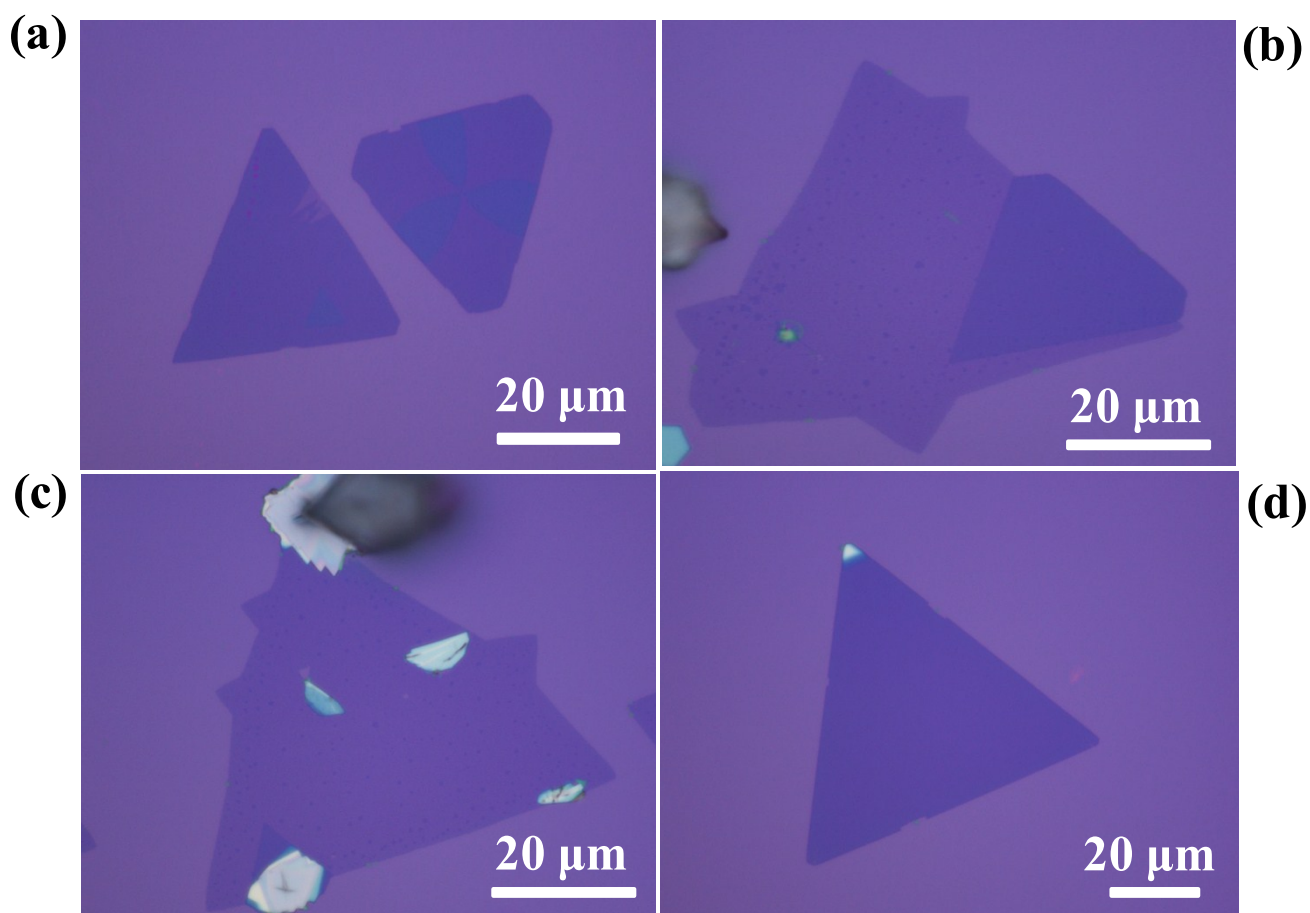**Figure S8 (a-d):** Typical optical images for CVD grown MoSe<sub>2</sub> nanosheets.
